# Supplementary material
Source: publisher figshare collection journal article supplement (https://acs.figshare.com/ndownloader/files/4512364)
Supplement: Supplementary file 1 [file 4512364]

**LEGENDS OF FIGURES TO BE INCLUDED IN SUPPORTING INFORMATION  
AVAILABLE**

**Figure 1S.** 2-DE images of all the TIF and NIF samples of both responder and non-responder patients.

**Figure 2S.** Magnified protein spots in TIF and NIF of responder and non-responder patients: effect of chemotherapy on cluster protein expression.

**Figure 3S.** Ion spectra for the single peptide identification observed for Polymerase I and transcript release factor (PTRF) reported in Table 2.
